# Supplementary material
Source: PubMed Central journal article supplement (PMC9149101)

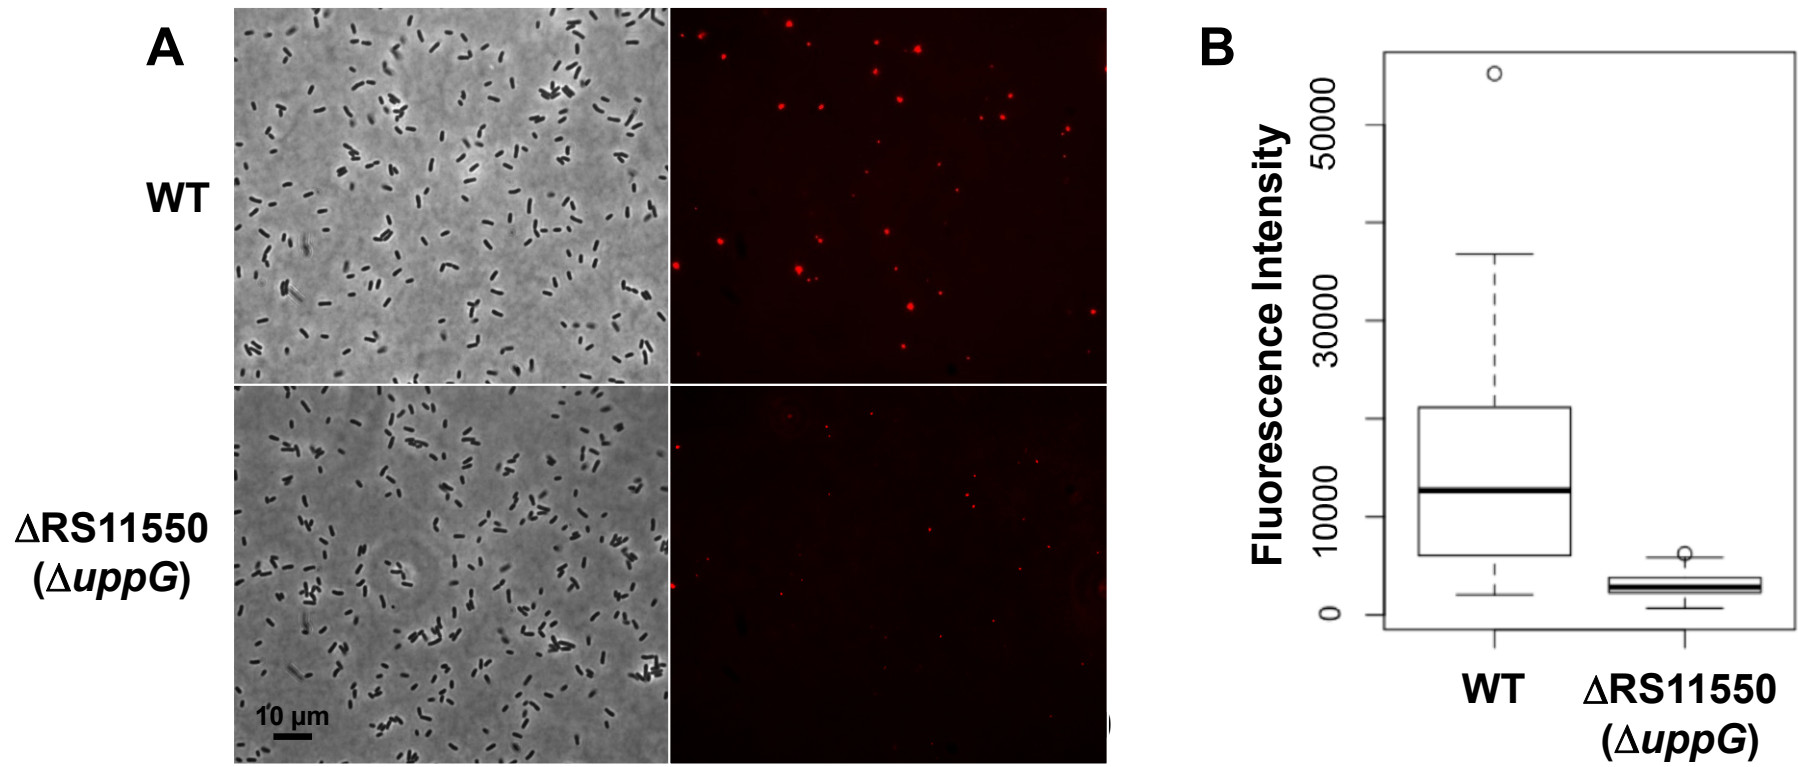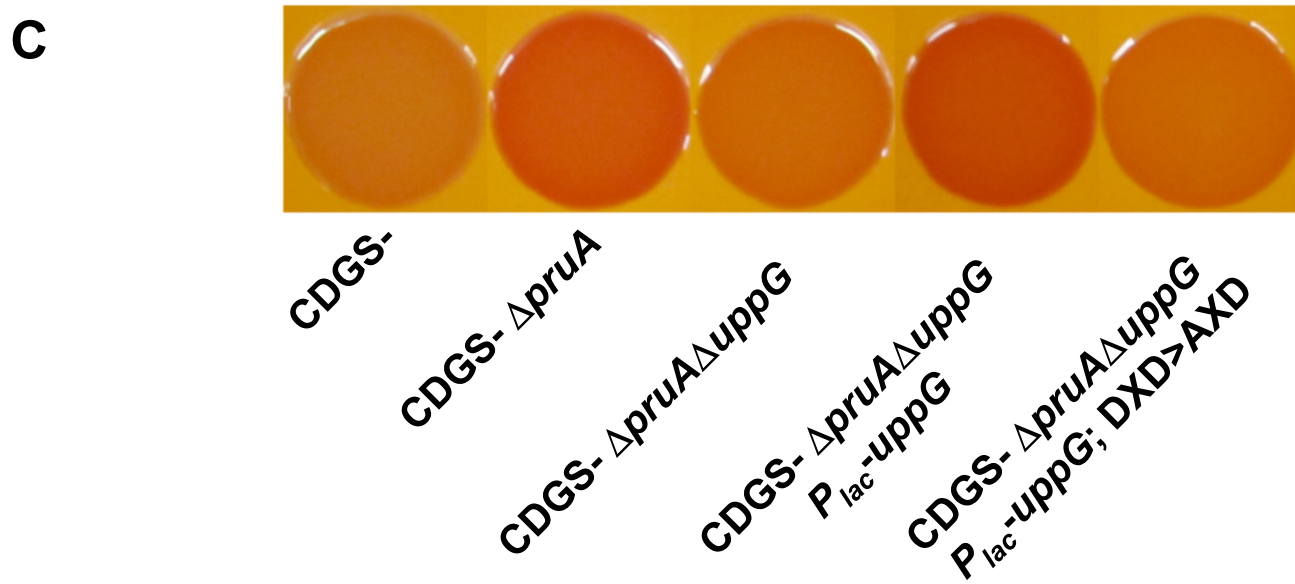

Figure S1 - Onyeziri et al.

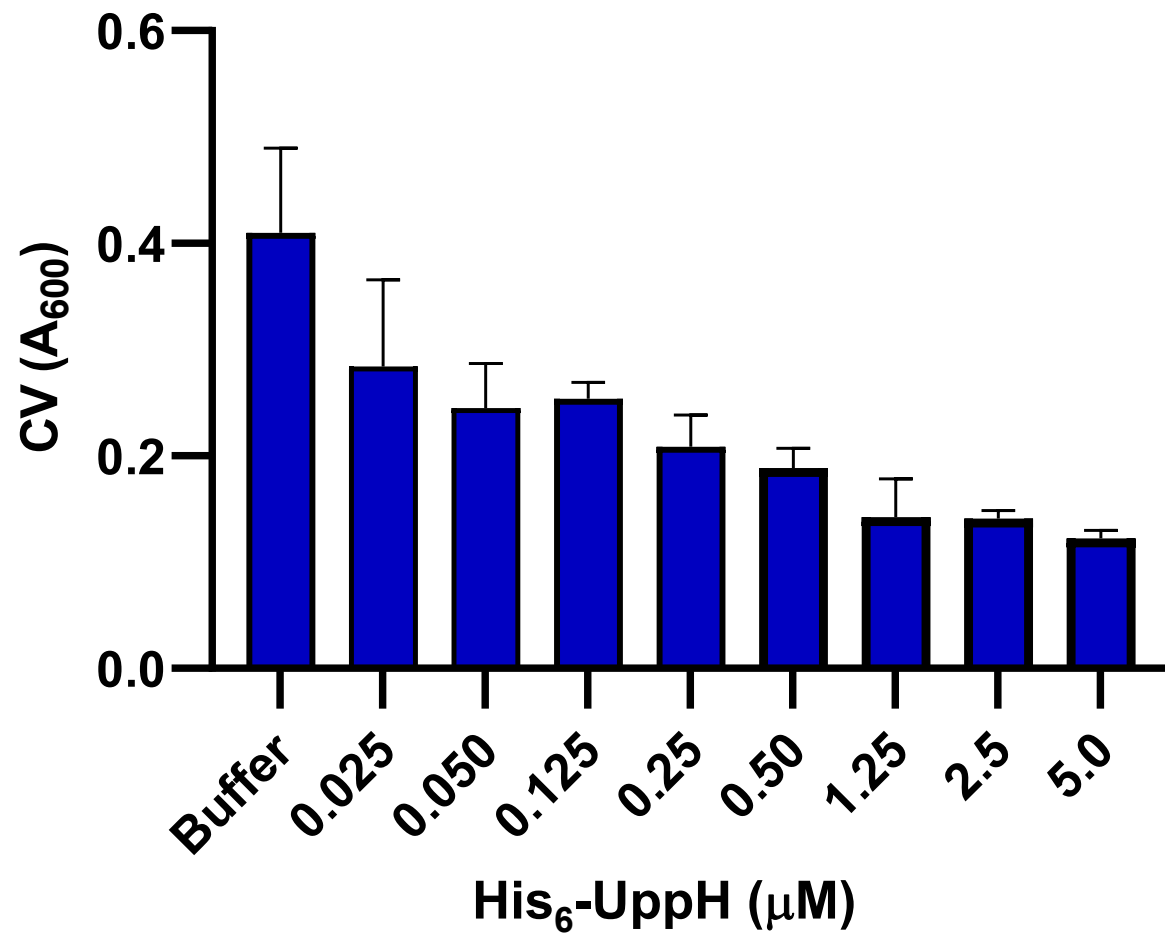

Figure S2 - Onyeziri et al.

**A**

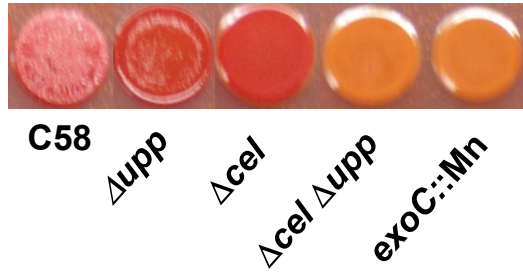

**B**

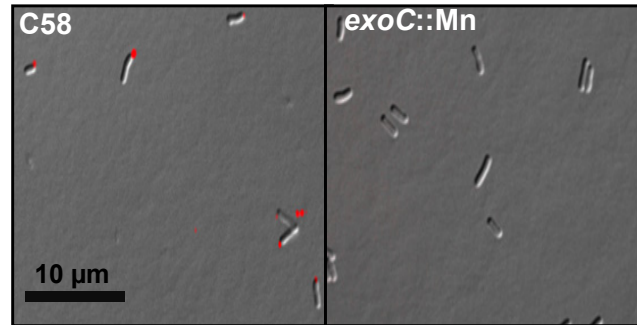

**C**

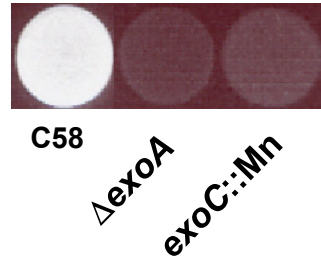

**D**

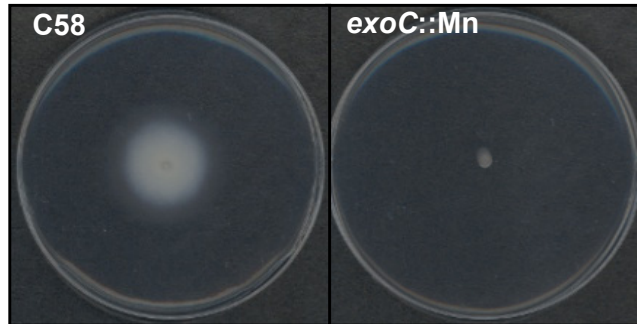

Figure S3 - Onyeziri et al.

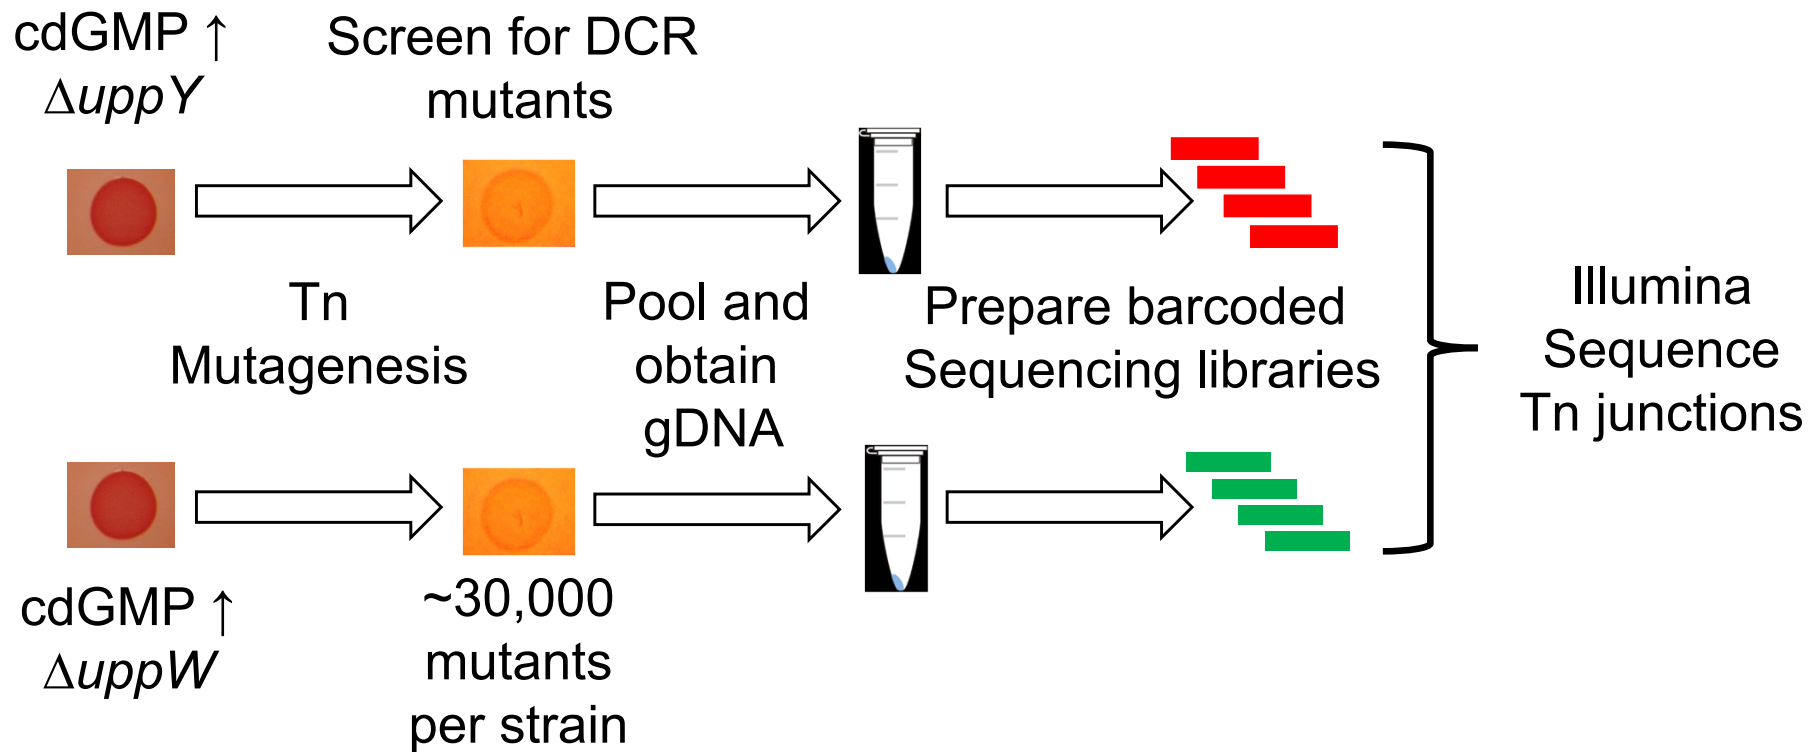

Figure S4 - Onyeziri et al.

**Figure S5**  
**Onyeziri\_et\_al.**

Gene presence/absence

- present
- present (<50% ID)
- absent

Branch Support

- unsupported
- UFBoot > 95%  
& SH-aLRT > 80%

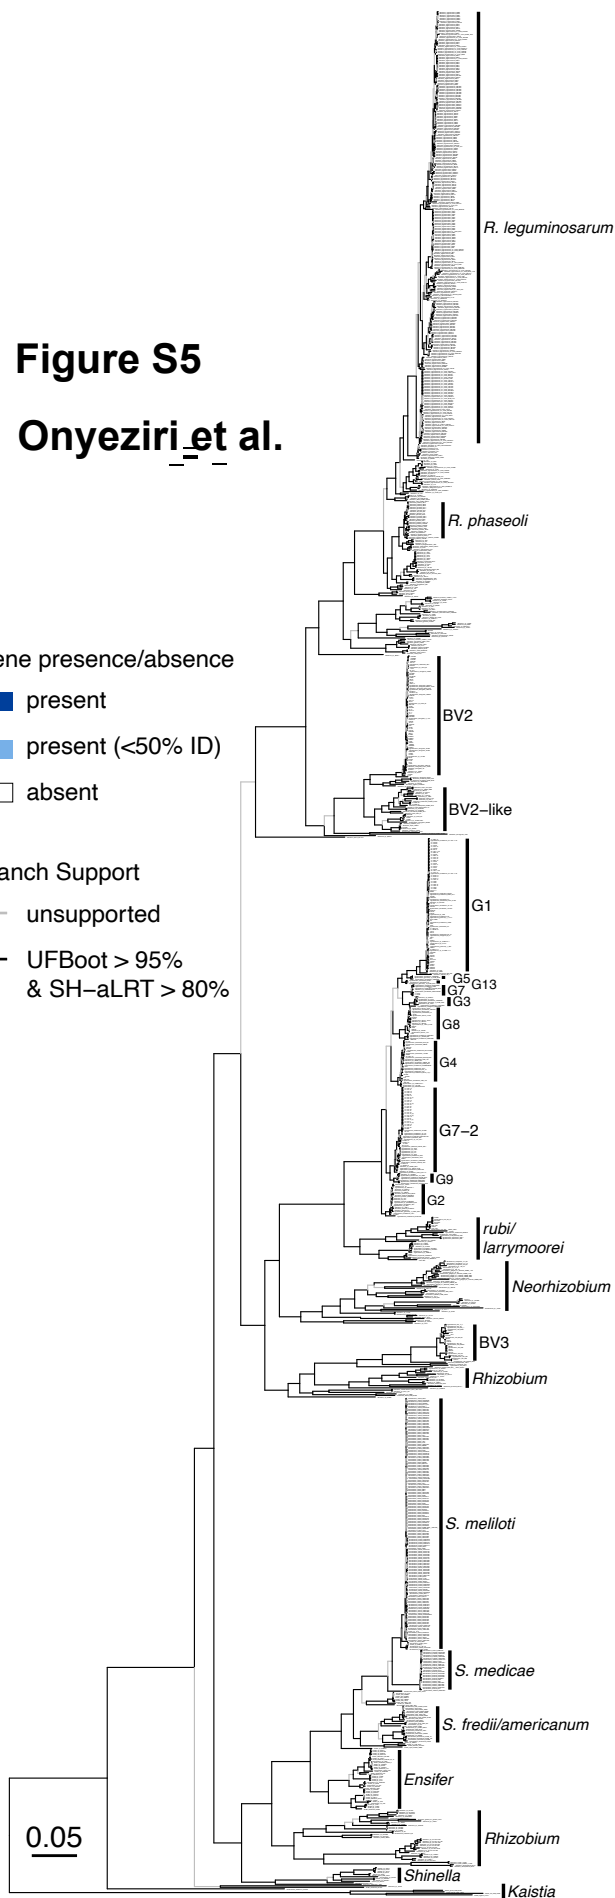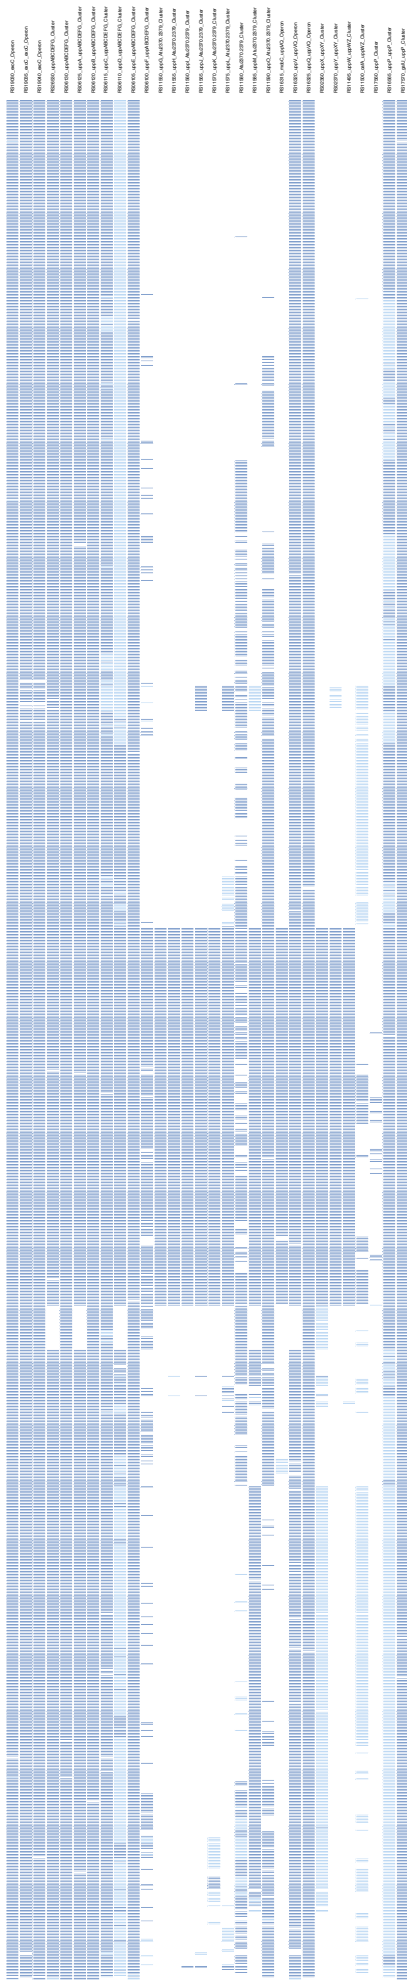

Figure S6  
Onyeziri et al.

BV1

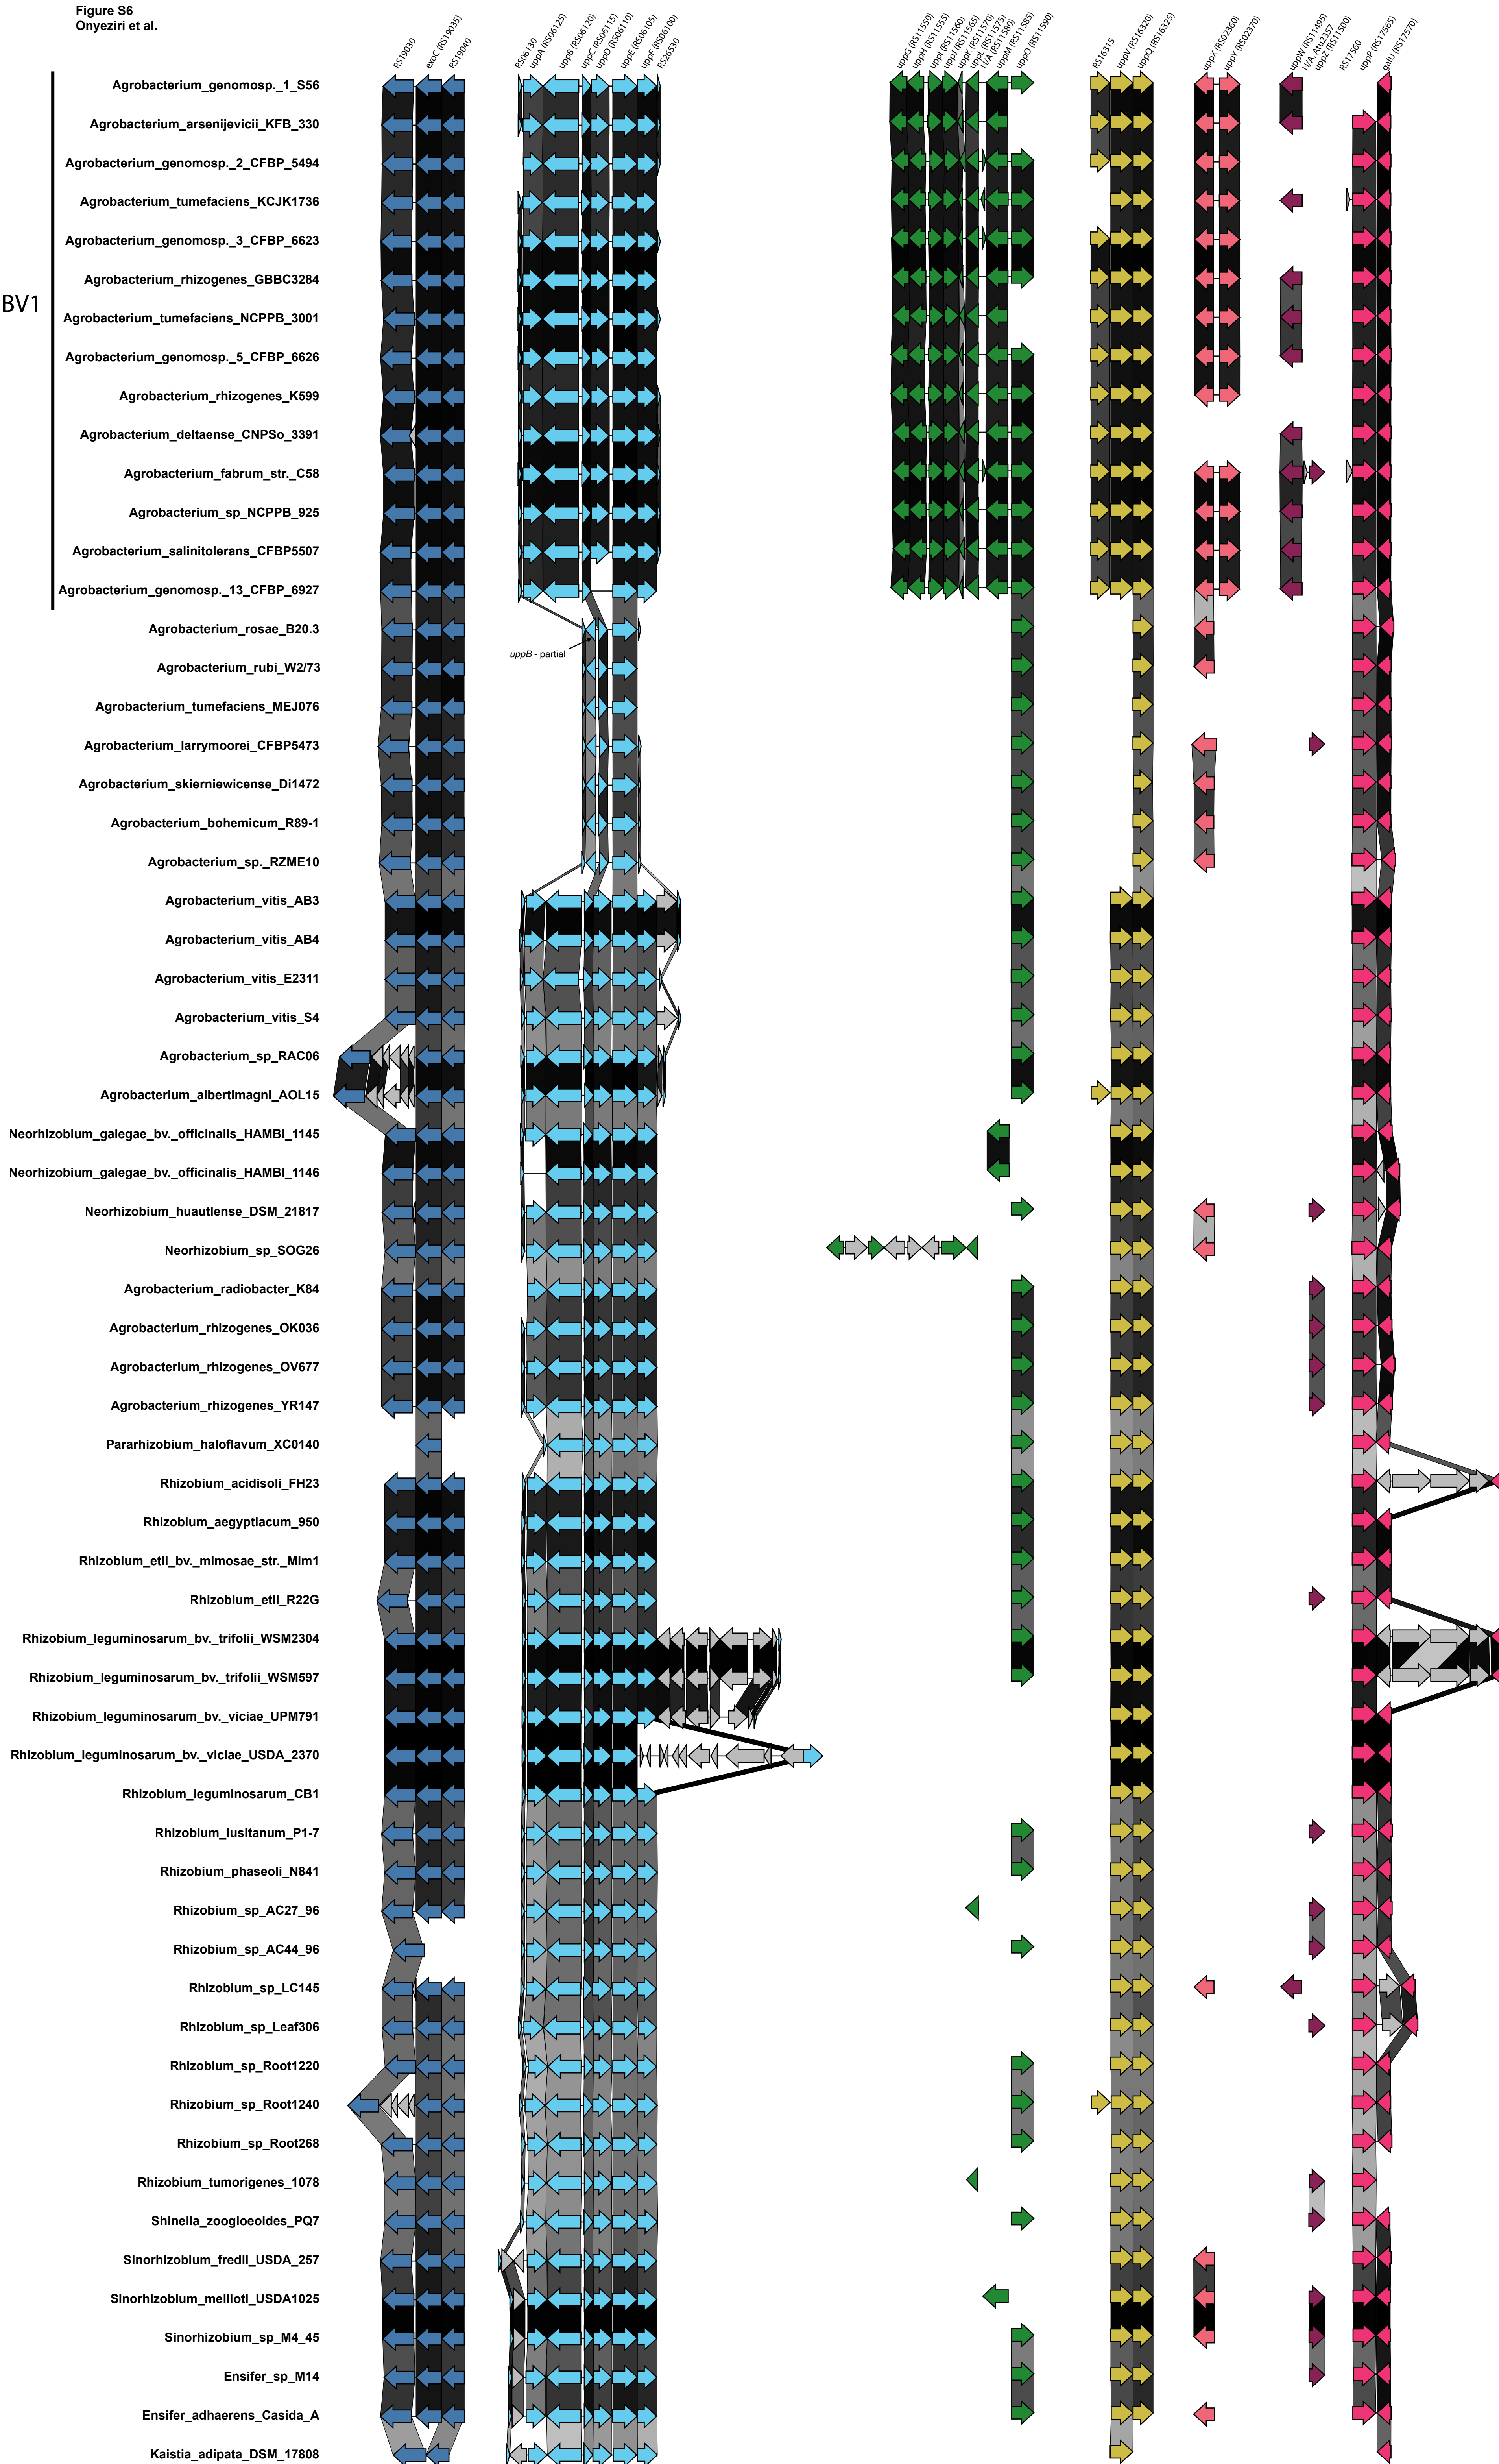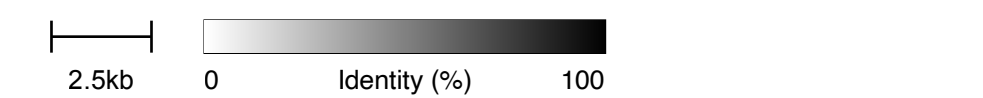

Supplement: NIHMS1781730-supplement-supinfo1.pdf [file NIHMS1781730-supplement-supinfo1.pdf]
